# Supplementary material
Source: publisher site journal article supplement (https://www.dovepress.com/article/323616)
Supplement: Supplementary file 1 [file get_supplementary_file.php]

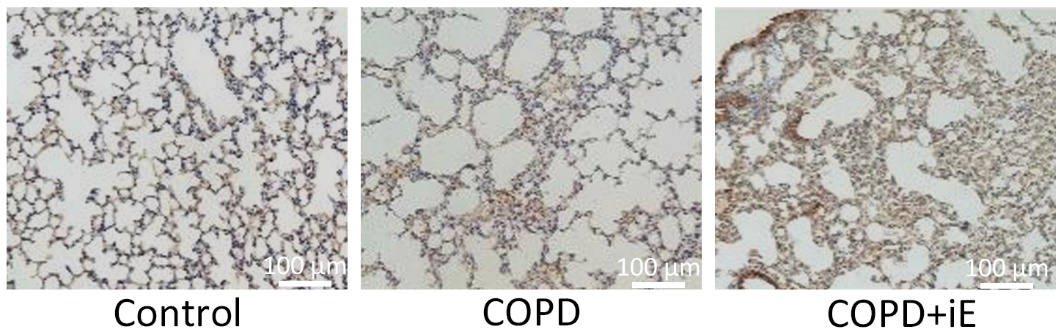


Figure S1. Immunohistochemistry analysis of NOD1 expressions in lung tissues among the three groups.
